# Supplementary material for: High velocity proton collision with liquid lithium: a time dependent density functional theory study
Source: Royal Society of Chemistry journal article supplement (doi:10.1039/c7cp00132k), 2017-01-01
Supplement: c7cp00132k1.pdf [file c7cp00132k1.pdf]

## Supplementary materials

Gang Bi,<sup>a,b</sup> Jun Kang<sup>b</sup> and Lin-Wang Wang<sup>b</sup>

<sup>a</sup> Department of Electronic Engineering, Zhejiang University City College, Hangzhou  
310015, China

<sup>b</sup> MSD, Lawrence Berkeley National Laboratory, Berkeley, CA 94720

Profile initial energy: 150eV

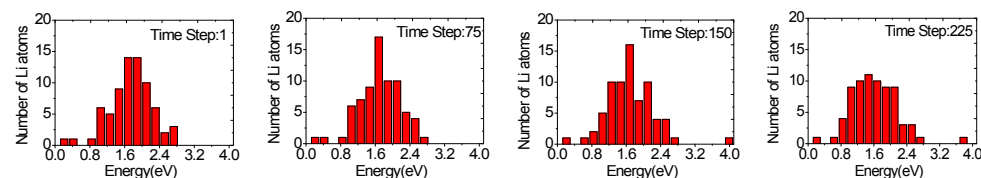

Profile initial energy: 500eV

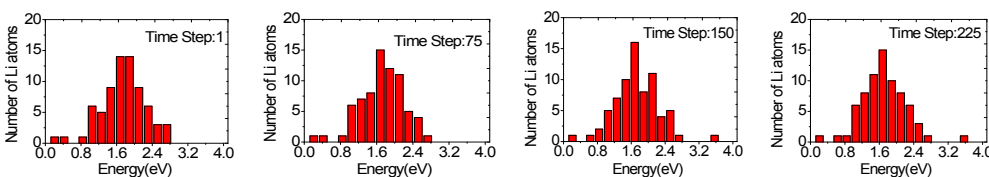

Profile initial energy: 1000eV

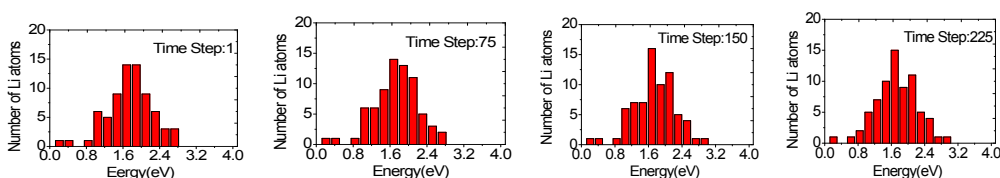

Profile initial energy: 5000eV

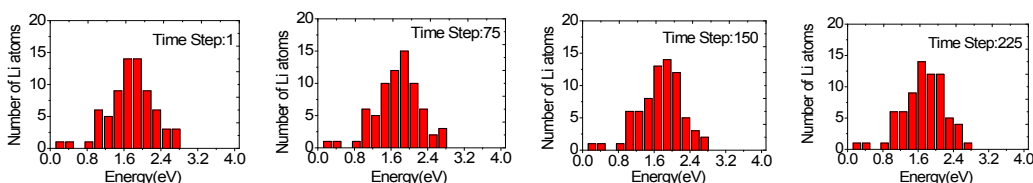

Profile initial energy: 10KeV

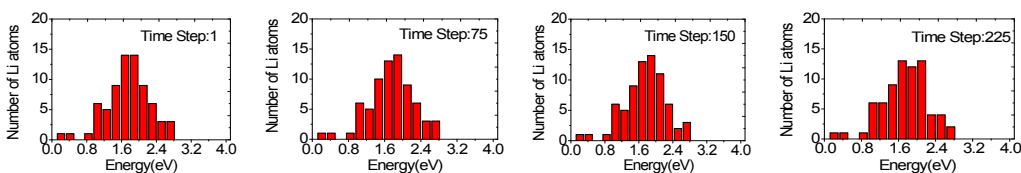

Profile initial energy: 1MeV

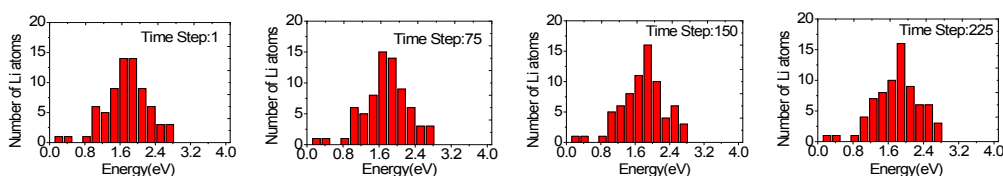

Fig. 1S the kinetic energy distribution of Li atoms at different projectile energies of proton
